# Supplementary material for: N-(5-Amino-9H-benzo[a]phenoxazin-9-ylidene)propan-1-aminium chlorides as antifungal agents and NIR fluorescent probes
Source: Royal Society of Chemistry journal article supplement (doi:10.1039/d1nj00879j), 2021-01-01
Supplement: d1nj00879j1.pdf [file d1nj00879j1.pdf]

1 **Supporting Information**

2  
3 ***N*-(5-Amino-9*H*-benzo[*a*]phenoxazin-9-ylidene)propan-1-aminium**  
4 **chlorides as antifungal agents and NIR fluorescence probes**

5  
6 Rui P. C. L. Sousa<sup>a,b</sup>, João C. C. Ferreira<sup>a,b,c</sup>, Maria João M. F. Sousa<sup>b,c</sup> and M. Sameiro

7 T. Gonçalves<sup>a</sup>

8 <sup>a</sup>*Centre of Chemistry*, <sup>b</sup>*Centre of Molecular and Environmental Biology*, <sup>c</sup>*Institute of*  
9 *Science and Innovation for Bio-Sustainability, University of Minho, Campus of Gualtar,*  
10 *4710-057 Braga, Portugal*

11 [msameiro@quimica.uminho.pt](mailto:msameiro@quimica.uminho.pt)

12  
13  
14 Absorption and emission spectra of compounds **3a-e** in ethanol and aqueous solutions  
15 of pH=3 and pH=5 are shown.

16  
17  
18  
19  
20

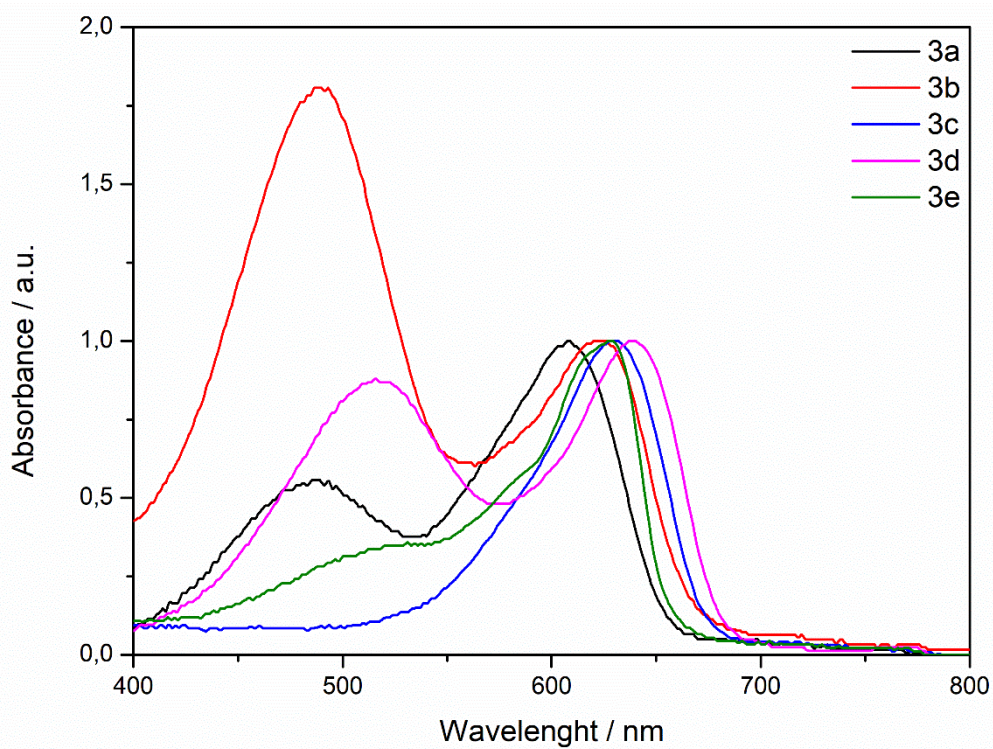

21

22 **Figure S1.** Normalized spectra of absorption of benzo[*a*]phenoxazinium chlorides **3a-e**  
 23 in ethanol.

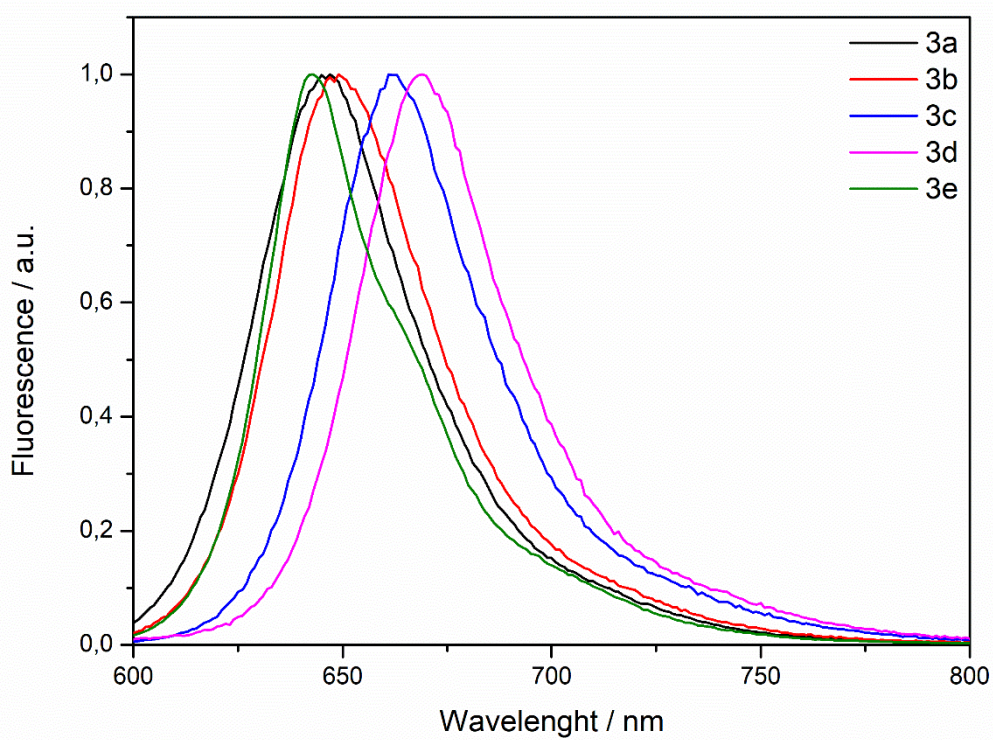

24

25 **Figure S2.** Normalized spectra of emission of benzo[*a*]phenoxazininium chlorides **3a-e** in  
26 ethanol.  
27

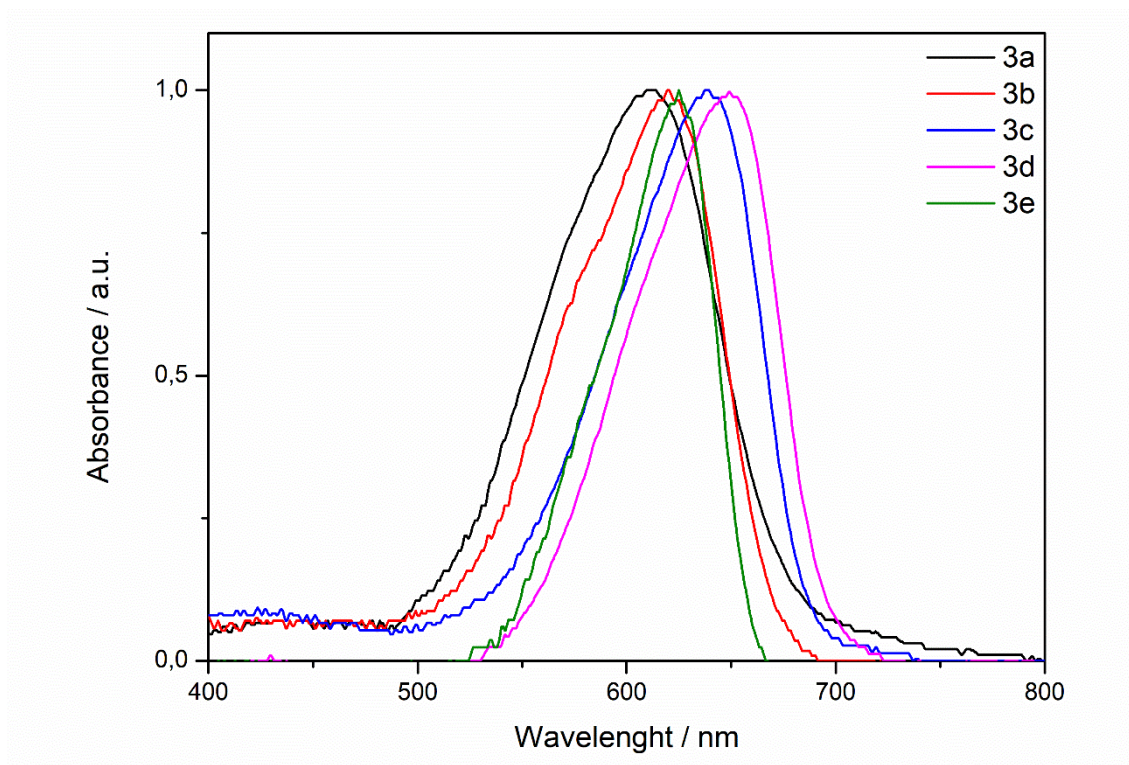

28  
29 **Figure S3.** Normalized spectra of absorption of benzo[*a*]phenoxazininium chlorides **3a-e**  
30 in aqueous solution of pH=3.  
31  
32



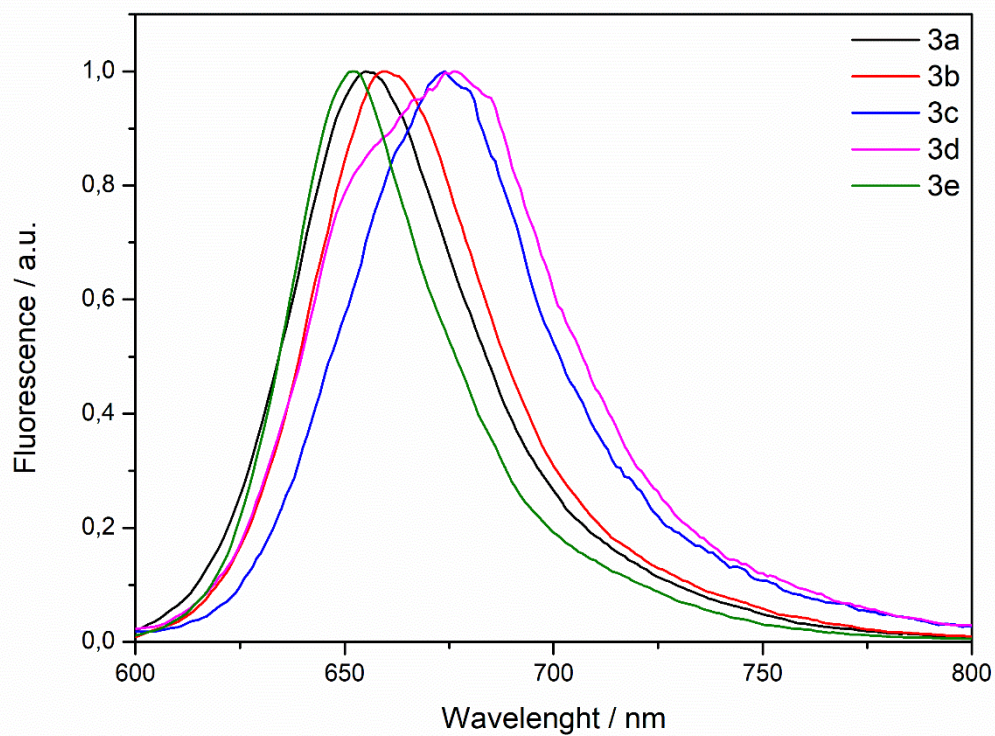

33

34 **Figure S4.** Normalized spectra of emission of benzo[*a*]phenoxazinium chlorides **3a-e** in  
35 aqueous solution of pH=3.

36

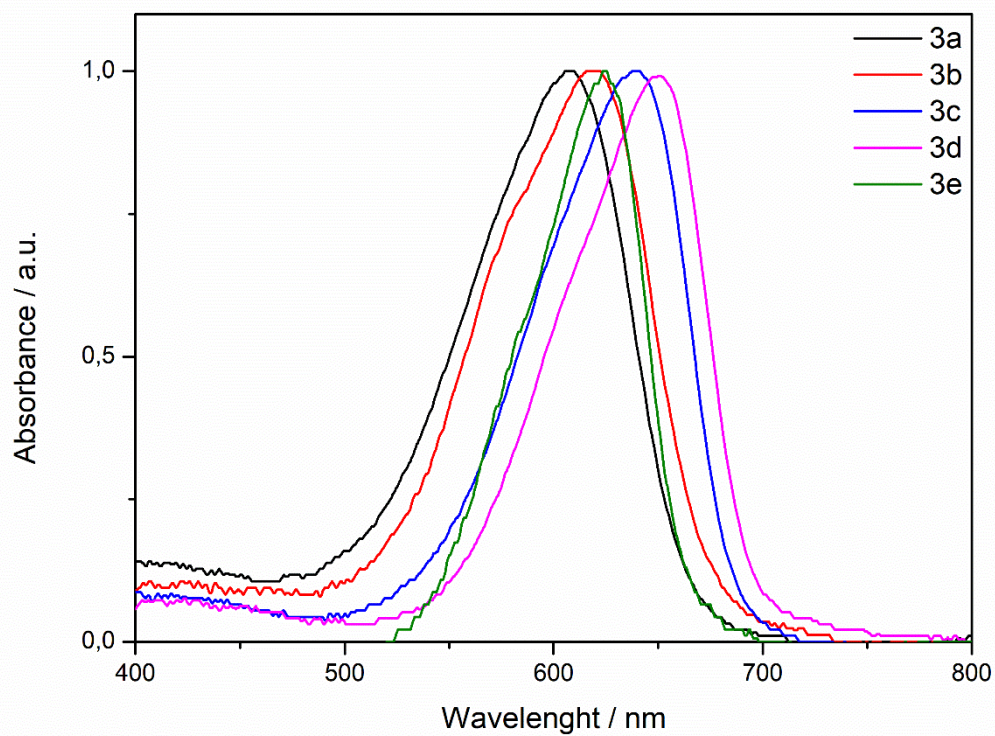

37

38 **Figure S5.** Normalized spectra of absorption of benzo[*a*]phenoxazinium chlorides **3a-e**  
39 in aqueous solution of pH=5.

40

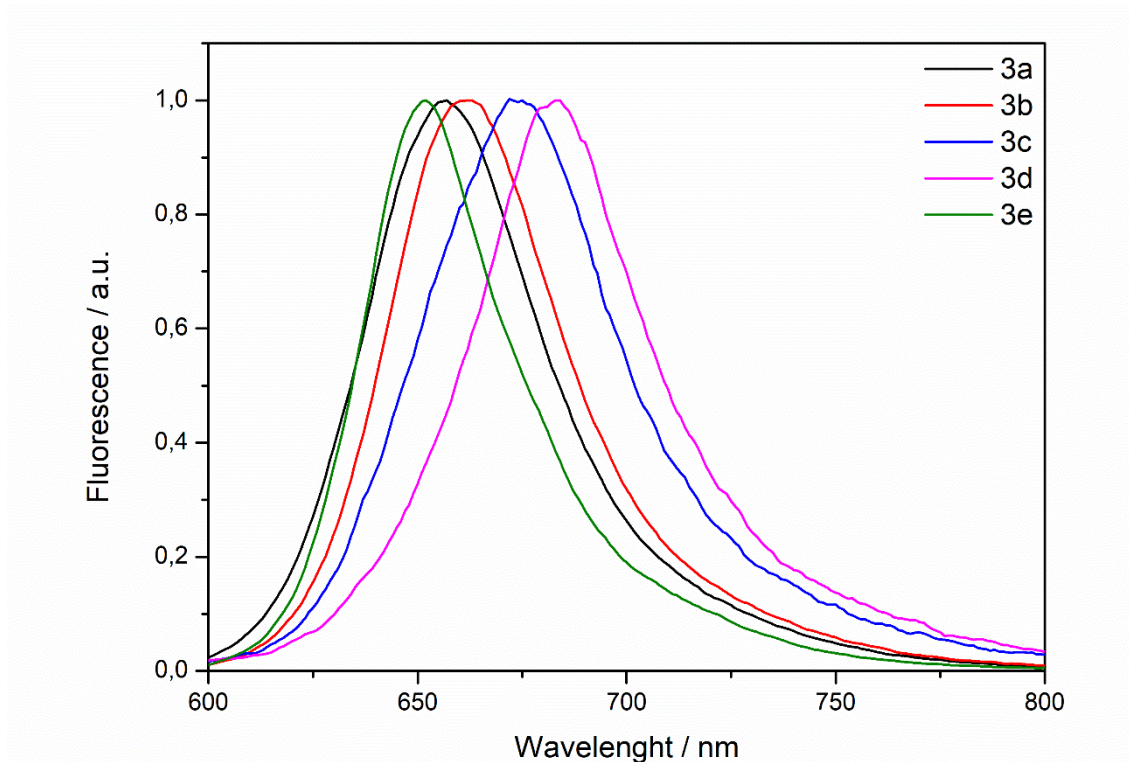

41

42 **Figure S6.** Normalized spectra of emission of benzo[*a*]phenoxazinium chlorides **3a-e** in  
43 aqueous solution of pH=5.

44
